# Supplementary material
Source: PubMed Central journal article supplement (PMC5615372)
Supplement: ci7b00347_si_001.pdf [file ci7b00347_si_001.pdf]

## Supplementary Information

### Statistical Analysis on the Performance of Molecular Mechanics Poisson–Boltzmann Surface Area versus Absolute Binding Free Energy Calculations: Bromodomains as a Case Study

Matteo Aldeghi<sup>1‡</sup>, Michael J. Bodkin<sup>2</sup>, Stefan Knapp<sup>3,4</sup> and Philip C. Biggin<sup>1\*</sup>

<sup>1</sup>Structural Bioinformatics and Computational Biochemistry, Department of Biochemistry, University of Oxford, South Parks Road, Oxford, OX1 3QU, United Kingdom.

<sup>2</sup>Evotec (U.K.) Ltd., 114 Innovation Drive, Milton Park, Abingdon, Oxfordshire OX14 4RZ, United Kingdom.

<sup>3</sup>Structural Genomics Consortium, Nuffield Department of Clinical Medicine, University of Oxford, Old Road Campus Research Building, Roosevelt Drive, Oxford OX3 7DQ, United Kingdom.

<sup>4</sup> Institute for Pharmaceutical Chemistry and Buchmann Institute for Life Sciences, Johann Wolfgang Goethe-University, D-60438 Frankfurt am Main, Germany.

<sup>‡</sup> Present address: Department of Computational and Theoretical Biophysics, Max Planck Institute for Biophysical Chemistry, D-37077, Göttingen, Germany

\*To whom correspondence should be addressed.

Email: [philip.biggin@bioch.ox.ac.uk](mailto:philip.biggin@bioch.ox.ac.uk)

Tel. +44 1865 613305

Fax. +44 1865 613238

**Table S1**

Summary table of the protein-ligand systems considered in the study. <sup>†</sup>ID refers to the indices used in Aldeghi *et al.*<sup>1</sup>; <sup>‡</sup> comparison to X-ray not possible due to the lack of a resolved structure.

|                     | <b>Protein</b> | <b>Ligand (ID)<sup>†</sup></b> | <b>Lig pose from</b> | <b>Protein PDB</b> | <b>Sim length</b> | <b>No. dock poses</b>             | <b>Reference</b>                           |
|---------------------|----------------|--------------------------------|----------------------|--------------------|-------------------|-----------------------------------|--------------------------------------------|
| <b>Test case 1a</b> | BRD4(1)        | BI-2356 (1)                    | X-ray                | 4OGI               | 10 ns             | n.a.                              | Ciceri <i>et al.</i> <sup>2</sup>          |
|                     | BRD4(1)        | JQ1(+) (2)                     | X-ray                | 3MXF               | 10 ns             | n.a.                              | Filippakopoulos <i>et al.</i> <sup>3</sup> |
|                     | BRD4(1)        | RVX-OH (3)                     | X-ray                | 4MR3               | 10 ns             | n.a.                              | Picaud <i>et al.</i> <sup>4</sup>          |
|                     | BRD4(1)        | TG-101348 (4)                  | X-ray                | 4OGJ               | 10 ns             | n.a.                              | Ciceri <i>et al.</i> <sup>2</sup>          |
|                     | BRD4(1)        | Isox-2 (5)                     | X-ray                | 4J0R               | 10 ns             | n.a.                              | Hewings <i>et al.</i> <sup>5</sup>         |
|                     | BRD4(1)        | BzT-7 (6)                      | X-ray                | 3U5L               | 10 ns             | n.a.                              | Filippakopoulos <i>et al.</i> <sup>6</sup> |
|                     | BRD4(1)        | RVX-208 (7)                    | X-ray                | 4MR4               | 10 ns             | n.a.                              | Picaud <i>et al.</i> <sup>4</sup>          |
|                     | BRD4(1)        | Alprazolam (8)                 | X-ray                | 3U5J               | 10 ns             | n.a.                              | Filippakopoulos <i>et al.</i> <sup>6</sup> |
|                     | BRD4(1)        | Isox-1 (9)                     | X-ray                | 3SVG               | 10 ns             | n.a.                              | Hewings <i>et al.</i> <sup>7</sup>         |
|                     | BRD4(1)        | Quinaz (10)                    | X-ray                | 4HBV               | 10 ns             | n.a.                              | Fish <i>et al.</i> <sup>8</sup>            |
| BRD4(1)             | Isox-cf3 (11)  | Model                          | 3SVG                 | 10 ns              | n.a.              | Vidler <i>et al.</i> <sup>9</sup> |                                            |
| <b>Test case 1b</b> | BRD4(1)        | BI-2356 (1)                    | Docking              | 2OSS               | 10 ns             | 3                                 | Ciceri <i>et al.</i> <sup>2</sup>          |
|                     | BRD4(1)        | JQ1(+) (2)                     | Docking              | 2OSS               | 10 ns             | 2                                 | Filippakopoulos <i>et al.</i> <sup>3</sup> |
|                     | BRD4(1)        | RVX-OH (3)                     | Docking              | 2OSS               | 10 ns             | 5                                 | Picaud <i>et al.</i> <sup>4</sup>          |
|                     | BRD4(1)        | TG-101348 (4)                  | Docking              | 2OSS               | 10 ns             | 1                                 | Ciceri <i>et al.</i> <sup>2</sup>          |
|                     | BRD4(1)        | Isox-2 (5)                     | Docking              | 2OSS               | 10 ns             | 2                                 | Hewings <i>et al.</i> <sup>5</sup>         |
|                     | BRD4(1)        | BzT-7 (6)                      | Docking              | 2OSS               | 10 ns             | 2                                 | Filippakopoulos <i>et al.</i> <sup>6</sup> |
|                     | BRD4(1)        | RVX-208 (7)                    | Docking              | 2OSS               | 10 ns             | 2                                 | Picaud <i>et al.</i> <sup>4</sup>          |
|                     | BRD4(1)        | Alprazolam (8)                 | Docking              | 2OSS               | 10 ns             | 2                                 | Filippakopoulos <i>et al.</i> <sup>6</sup> |
|                     | BRD4(1)        | Isox-1 (9)                     | Docking              | 2OSS               | 10 ns             | 3                                 | Hewings <i>et al.</i> <sup>7</sup>         |
|                     | BRD4(1)        | Quinaz (10)                    | Docking              | 2OSS               | 10 ns             | 1                                 | Fish <i>et al.</i> <sup>8</sup>            |
| BRD4(1)             | Isox-cf3 (11)  | Docking                        | 2OSS                 | 10 ns              | 2 <sup>‡</sup>    | Vidler <i>et al.</i> <sup>9</sup> |                                            |
| <b>Test case 2</b>  | BRD2(1)        | RVX-OH                         | Docking              | 4ALG               | 15 ns             | 2                                 | Picaud <i>et al.</i> <sup>4</sup>          |
|                     | BRD2(2)        | RVX-OH                         | Docking              | 4MR5               | 15 ns             | 2                                 | Picaud <i>et al.</i> <sup>4</sup>          |
|                     | BRD3(1)        | RVX-OH                         | Docking              | 3S91               | 15 ns             | 2                                 | Picaud <i>et al.</i> <sup>4</sup>          |
|                     | BRD2(2)        | RVX-OH                         | Docking              | 3S92               | 15 ns             | 2                                 | Picaud <i>et al.</i> <sup>4</sup>          |
|                     | BRD4(1)        | RVX-OH                         | Docking              | 2OSS               | 15 ns             | 2                                 | Picaud <i>et al.</i> <sup>4</sup>          |
|                     | BRD4(2)        | RVX-OH                         | Docking              | 2OUO               | 15 ns             | 2                                 | Picaud <i>et al.</i> <sup>4</sup>          |
|                     | BRDT(1)        | RVX-OH                         | Docking              | 4KCX               | 15 ns             | 2                                 | Picaud <i>et al.</i> <sup>4</sup>          |
|                     | BRD2(1)        | RVX-208                        | Docking              | 4ALG               | 15 ns             | 1                                 | Picaud <i>et al.</i> <sup>4</sup>          |
|                     | BRD2(2)        | RVX-208                        | Docking              | 4MR5               | 15 ns             | 1                                 | Picaud <i>et al.</i> <sup>4</sup>          |
|                     | BRD3(1)        | RVX-208                        | Docking              | 3S91               | 15 ns             | 1                                 | Picaud <i>et al.</i> <sup>4</sup>          |
|                     | BRD2(2)        | RVX-208                        | Docking              | 3S92               | 15 ns             | 1                                 | Picaud <i>et al.</i> <sup>4</sup>          |
|                     | BRD4(1)        | RVX-208                        | Docking              | 2OSS               | 15 ns             | 1                                 | Picaud <i>et al.</i> <sup>4</sup>          |
|                     | BRD4(2)        | RVX-208                        | Docking              | 2OUO               | 15 ns             | 1                                 | Picaud <i>et al.</i> <sup>4</sup>          |
|                     | BRDT(1)        | RVX-208                        | Docking              | 4KCX               | 15 ns             | 1                                 | Picaud <i>et al.</i> <sup>4</sup>          |
| <b>Test case 3</b>  | CECR2          | Bromosporine                   | Docking              | 3NXB               | 15 ns             | 1                                 | Picaud <i>et al.</i> <sup>10</sup>         |
|                     | FALZ           | Bromosporine                   | Docking              | 3UV2               | 15 ns             | 1                                 | Picaud <i>et al.</i> <sup>10</sup>         |
|                     | PCAF           | Bromosporine                   | Docking              | 3GG3               | 15 ns             | 1                                 | Picaud <i>et al.</i> <sup>10</sup>         |
|                     | BRD2(1)        | Bromosporine                   | Docking              | 4ALG               | 15 ns             | 1                                 | Picaud <i>et al.</i> <sup>10</sup>         |
|                     | BRD2(2)        | Bromosporine                   | Docking              | 4MR5               | 15 ns             | 1                                 | Picaud <i>et al.</i> <sup>10</sup>         |
|                     | BRD3(1)        | Bromosporine                   | Docking              | 3S91               | 15 ns             | 1                                 | Picaud <i>et al.</i> <sup>10</sup>         |
|                     | BRD3(2)        | Bromosporine                   | Docking              | 3S92               | 15 ns             | 1                                 | Picaud <i>et al.</i> <sup>10</sup>         |
|                     | BRD4(1)        | Bromosporine                   | Docking              | 2OSS               | 15 ns             | 1                                 | Picaud <i>et al.</i> <sup>10</sup>         |
|                     | BRD4(2)        | Bromosporine                   | Docking              | 2OUO               | 15 ns             | 1                                 | Picaud <i>et al.</i> <sup>10</sup>         |
|                     | BRDT(1)        | Bromosporine                   | Docking              | 4KCX               | 15 ns             | 1                                 | Picaud <i>et al.</i> <sup>10</sup>         |
|                     | CREBBP         | Bromosporine                   | Docking              | 4NYX               | 15 ns             | 1                                 | Picaud <i>et al.</i> <sup>10</sup>         |
|                     | EP300          | Bromosporine                   | Docking              | 3I3J               | 15 ns             | 1                                 | Picaud <i>et al.</i> <sup>10</sup>         |
|                     | BRD1           | Bromosporine                   | Docking              | 5AME               | 15 ns             | 1                                 | Picaud <i>et al.</i> <sup>10</sup>         |
|                     | BRD9           | Bromosporine                   | Docking              | 4XY8               | 15 ns             | 1                                 | Picaud <i>et al.</i> <sup>10</sup>         |
|                     | BRPF1B         | Bromosporine                   | Docking              | 4LC2               | 15 ns             | 1                                 | Picaud <i>et al.</i> <sup>10</sup>         |
|                     | BAZ2A          | Bromosporine                   | Docking              | 4QBM               | 15 ns             | 1                                 | Picaud <i>et al.</i> <sup>10</sup>         |
|                     | TIF1           | Bromosporine                   | Docking              | 4YBM               | 15 ns             | 1                                 | Picaud <i>et al.</i> <sup>10</sup>         |
|                     | TAF1(1)        | Bromosporine                   | Docking              | 3UV5               | 15 ns             | 1                                 | Picaud <i>et al.</i> <sup>10</sup>         |
|                     | TAF1(2)        | Bromosporine                   | Docking              | 3UV4               | 15 ns             | 1                                 | Picaud <i>et al.</i> <sup>10</sup>         |
|                     | TAF1L(2)       | Bromosporine                   | Docking              | 3HMH               | 15 ns             | 1                                 | Picaud <i>et al.</i> <sup>10</sup>         |
|                     | PB1(5)         | Bromosporine                   | Docking              | 3MB4               | 15 ns             | 1                                 | Picaud <i>et al.</i> <sup>10</sup>         |
|                     | SMARCA4        | Bromosporine                   | Docking              | 2GRC               | 15 ns             | 1                                 | Picaud <i>et al.</i> <sup>10</sup>         |

**Figure S1**

Distributions of Spearman correlation values for the protocol W0 and for ABFE calculations, obtained by bootstrap and based on the uncertainties of the experimental affinity measurements and computational predictions. The probability densities on the bottom row show the distribution of  $r_s$  for ABFE subtracted from the distribution of  $r_s$  for MMPBSA. The fraction of the area above or below zero is reported on the plots, the median is shown as a dashed line, and a difference value of zero is marked with a vertical gray dotted line.

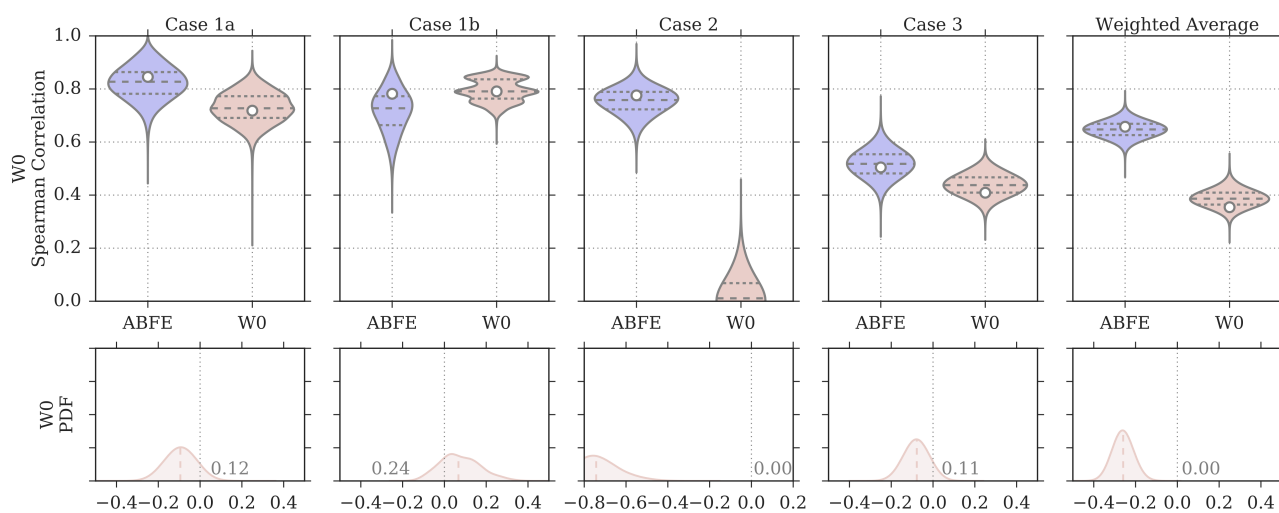

**Figure S2**

Distributions of Spearman correlation values for the protocol W0e and for ABFE calculations, obtained by bootstrap and based on the uncertainties of the experimental affinity measurements and computational predictions. The probability densities on the bottom row show the distribution of  $r_s$  for ABFE subtracted from the distribution of  $r_s$  for MMPBSA. The fraction of the area above or below zero is reported on the plots, the median is shown as a dashed line, and a difference value of zero is marked with a vertical gray dotted line.

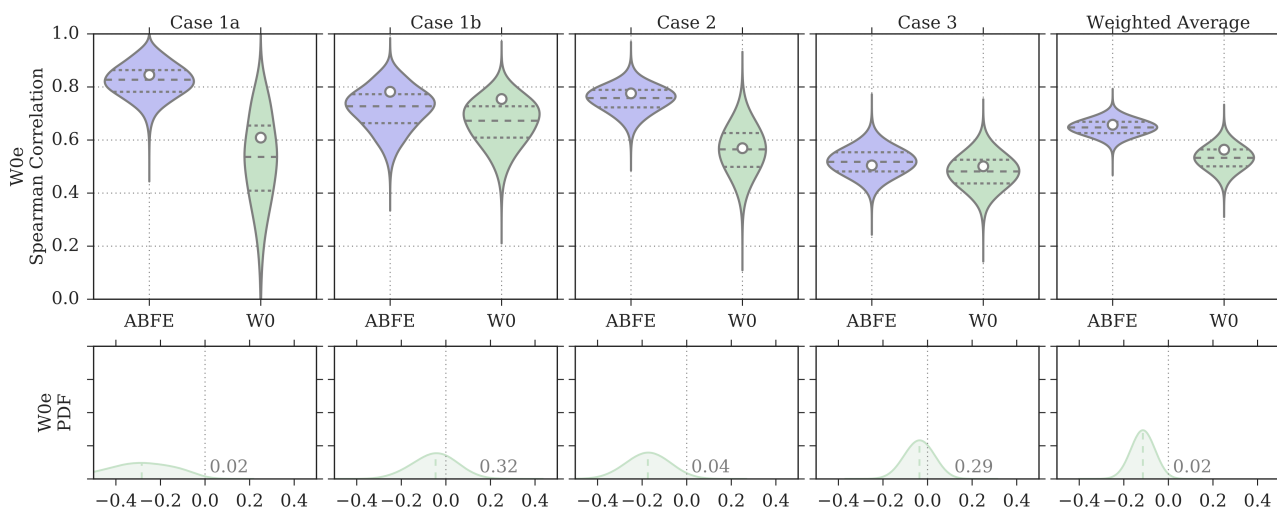

**Figure S3**

Distributions of Spearman correlation values for the protocols W10, W20, W30, W40, and W5, and for ABFE calculations, obtained by bootstrap and based on the uncertainties of the experimental affinity measurements and computational predictions. The probability densities on the bottom row show the distribution of  $r_s$  for ABFE subtracted from the distribution of  $r_s$  for MMPBSA. The fraction of the area above or below zero is reported on the plots, the median is shown as a dashed line, and a difference value of zero is marked with a vertical gray dotted line.

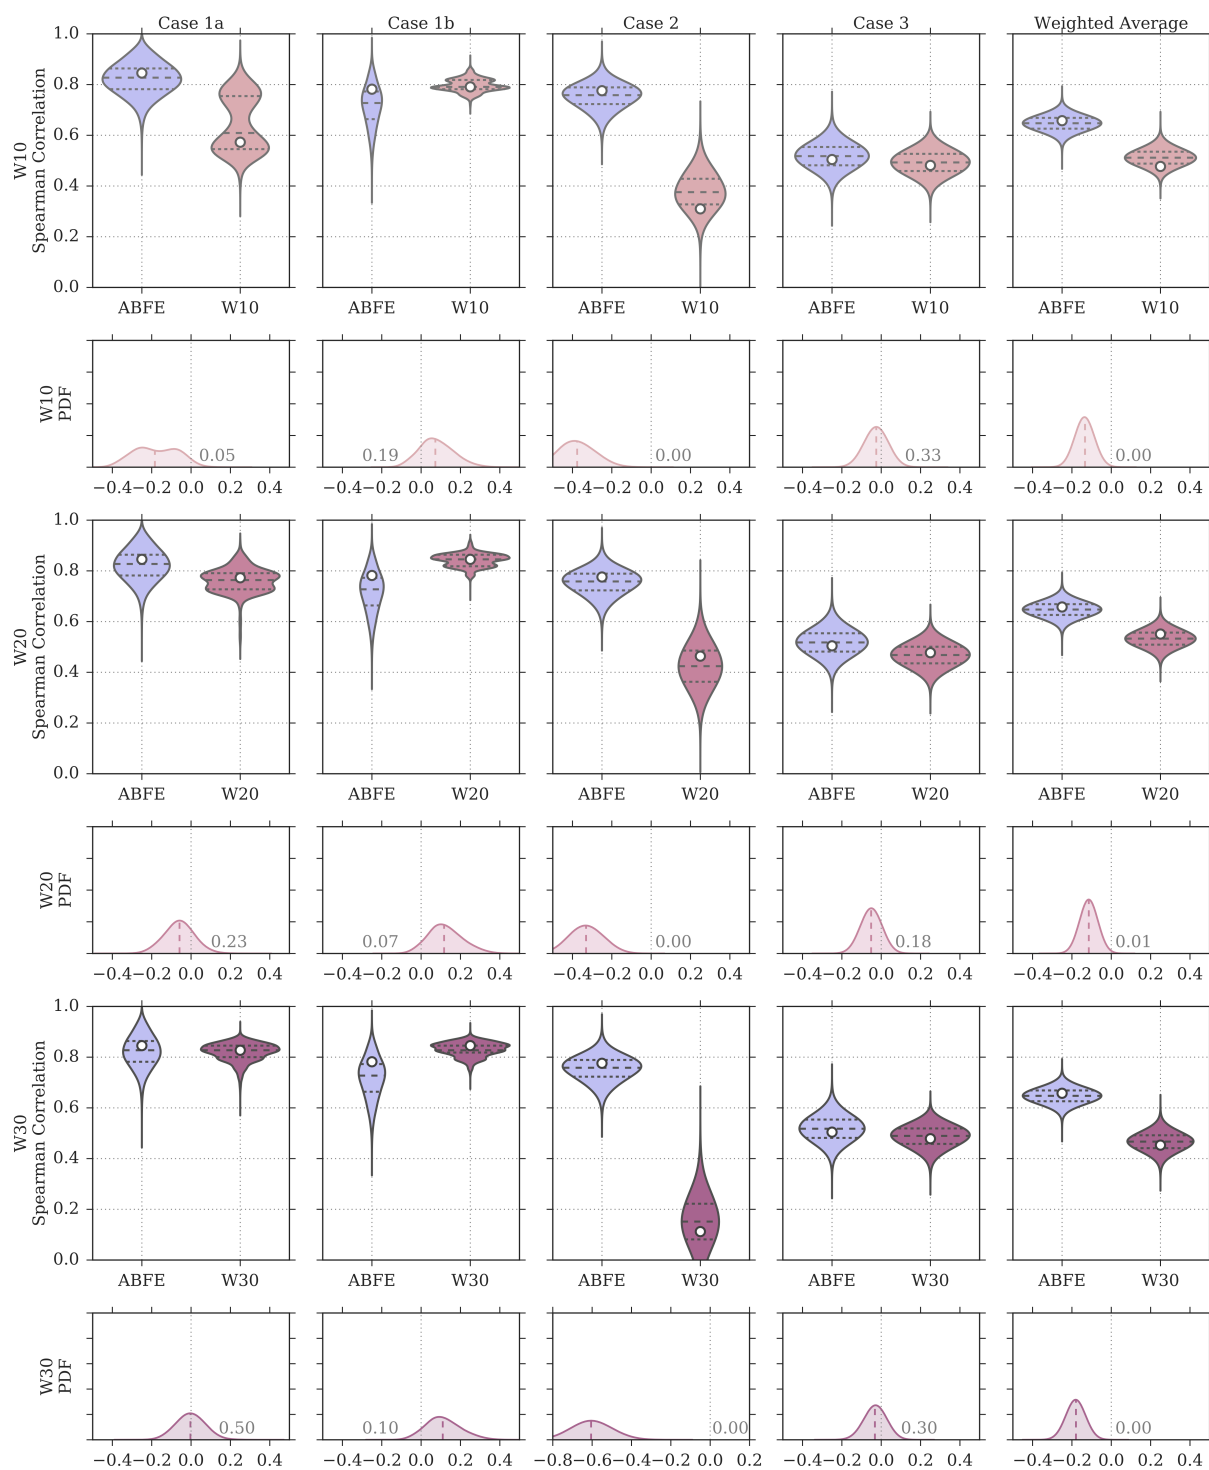

Figure S3 (continued)

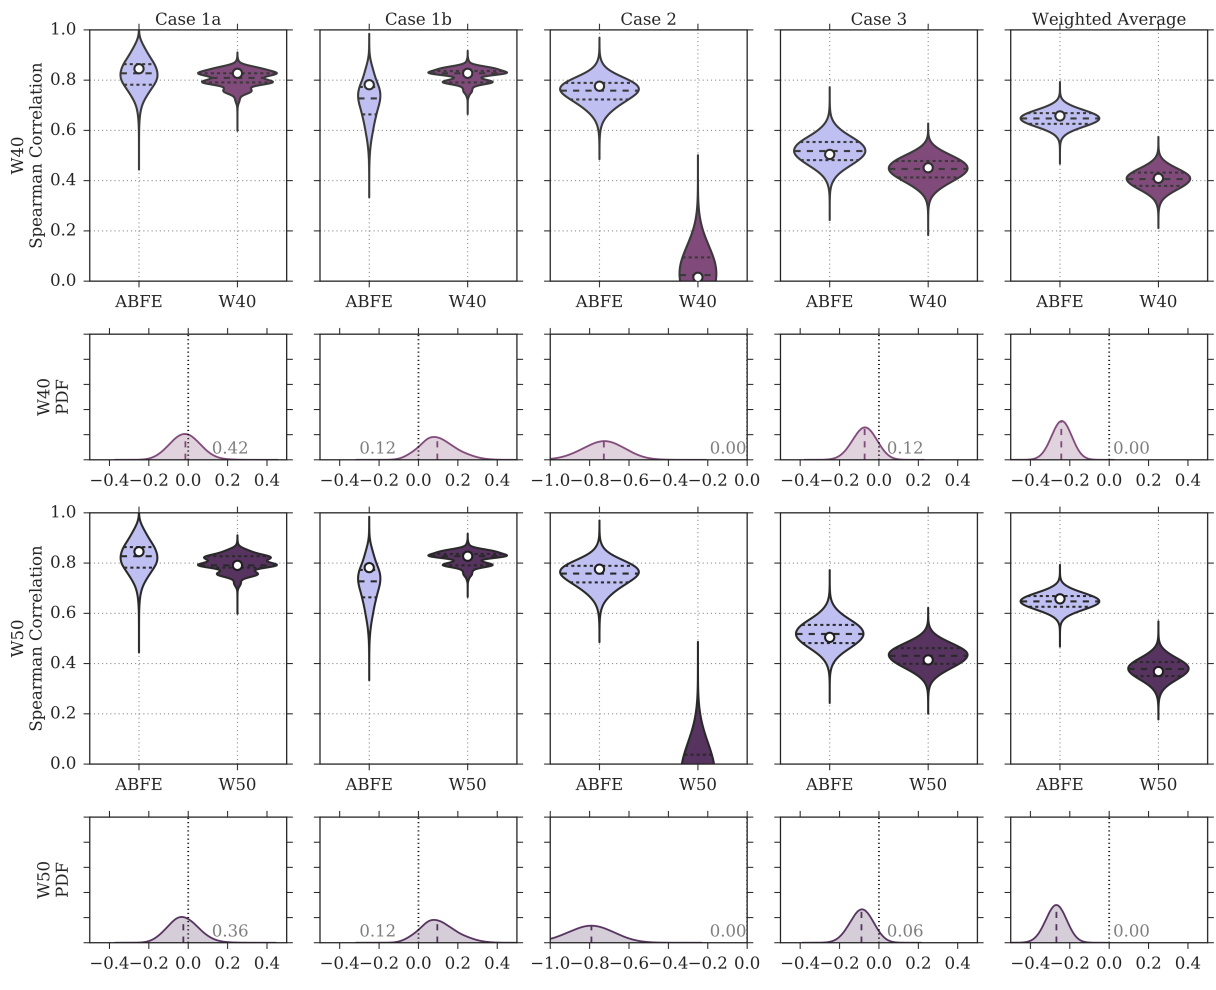

**Table S1** Overview of the results obtained with ABFE and MMPBSA calculations, in terms of Pearson and Spearman correlation to experimental binding free energies, for the protocols W10e to W50e. In square brackets are the 95% confidence intervals of the statistics.

| <b>Pearson Correlation</b> |                       |                      |                      |                      |                      |
|----------------------------|-----------------------|----------------------|----------------------|----------------------|----------------------|
| <b>Test Case N°</b>        | <b>W10e</b>           | <b>W20e</b>          | <b>W30e</b>          | <b>W40e</b>          | <b>W50e</b>          |
| <b>1a</b>                  | 0.31<br>[-0.09, 0.66] | 0.62<br>[0.39, 0.75] | 0.80<br>[0.60, 0.89] | 0.87<br>[0.61, 0.93] | 0.90<br>[0.74, 0.94] |
| <b>1b</b>                  | 0.51<br>[0.35, 0.62]  | 0.85<br>[0.75, 0.90] | 0.88<br>[0.80, 0.93] | 0.92<br>[0.86, 0.95] | 0.91<br>[0.86, 0.94] |
| <b>2</b>                   | 0.64<br>[0.48, 0.74]  | 0.62<br>[0.30, 0.73] | 0.58<br>[0.28, 0.72] | 0.38<br>[0.06, 0.57] | 0.34<br>[0.01, 0.55] |
| <b>3</b>                   | 0.35<br>[0.24, 0.43]  | 0.24<br>[0.11, 0.34] | 0.29<br>[0.16, 0.40] | 0.22<br>[0.06, 0.36] | 0.22<br>[0.05, 0.35] |
| <b>Weighted Average</b>    | 0.45<br>[0.28, 0.57]  | 0.47<br>[0.27, 0.57] | 0.51<br>[0.32, 0.61] | 0.43<br>[0.22, 0.56] | 0.41<br>[0.22, 0.55] |

  

| <b>Spearman Correlation</b> |                       |                      |                      |                       |                       |
|-----------------------------|-----------------------|----------------------|----------------------|-----------------------|-----------------------|
| <b>Test Case N°</b>         | <b>W10e</b>           | <b>W20e</b>          | <b>W30e</b>          | <b>W40e</b>           | <b>W50e</b>           |
| <b>1a</b>                   | 0.09<br>[-0.17, 0.49] | 0.54<br>[0.19, 0.61] | 0.61<br>[0.35, 0.88] | 0.88<br>[0.45, 0.94]  | 0.90<br>[0.58, 0.95]  |
| <b>1b</b>                   | 0.35<br>[0.19, 0.56]  | 0.71<br>[0.60, 0.85] | 0.83<br>[0.69, 0.91] | 0.85<br>[0.77, 0.95]  | 0.88<br>[0.76, 0.95]  |
| <b>2</b>                    | 0.44<br>[0.26, 0.64]  | 0.50<br>[0.22, 0.71] | 0.48<br>[0.13, 0.68] | 0.29<br>[-0.05, 0.49] | 0.31<br>[-0.08, 0.47] |
| <b>3</b>                    | 0.35<br>[0.23, 0.49]  | 0.37<br>[0.21, 0.49] | 0.42<br>[0.21, 0.53] | 0.31<br>[0.11, 0.46]  | 0.27<br>[0.11, 0.46]  |
| <b>Weighted Average</b>     | 0.34<br>[0.19, 0.54]  | 0.47<br>[0.26, 0.61] | 0.51<br>[0.26, 0.66] | 0.43<br>[0.18, 0.58]  | 0.43<br>[0.18, 0.58]  |

## References

- (1) Aldeghi, M.; Heifetz, A.; Bodkin, M. J.; Knapp, S.; Biggin, P. C. Accurate Calculation of the Absolute Free Energy of Binding for Drug Molecules. *Chem. Sci.* **2016**, *7* (1), 207–218.
- (2) Ciceri, P.; Müller, S.; O'Mahony, A.; Fedorov, O.; Filippakopoulos, P.; Hunt, J. P.; Lasater, E. A.; Pallares, G.; Picaud, S.; Wells, C.; Martin, S.; Wodicka, L. M.; Shah, N. P.; Treiber, D. K.; Knapp, S. Dual Kinase-Bromodomain Inhibitors for Rationally Designed Polypharmacology. *Nat Chem Biol* **2014**, *10* (4), 305–312.
- (3) Filippakopoulos, P.; Qi, J.; Picaud, S.; Shen, Y.; Smith, W. B.; Fedorov, O.; Morse, E. M.; Keates, T.; Hickman, T. T.; Felletar, I.; Philpott, M.; Munro, S.; McKeown, M. R.; Wang, Y.; Christie, A. L.; West, N.; Cameron, M. J.; Schwartz, B.; Heightman, T. D.; La Thangue, N.; French, C. A.; Wiest, O.; Kung, A. L.; Knapp, S.; Bradner, J. E. Selective Inhibition of BET Bromodomains. *Nature* **2010**, *468* (7327), 1067–1073.
- (4) Picaud, S.; Wells, C.; Felletar, I.; Brotherton, D.; Martin, S.; Savitsky, P.; Diez-Dacal, B.; Philpott, M.; Bountra, C.; Lingard, H.; Fedorov, O.; Müller, S.; Brennan, P. E.; Knapp, S.; Filippakopoulos, P. RVX-208, an Inhibitor of BET Transcriptional Regulators with Selectivity for the Second Bromodomain. *Proc. Natl. Acad. Sci.* **2013**.
- (5) Hewings, D. S.; Fedorov, O.; Filippakopoulos, P.; Martin, S.; Picaud, S.; Tumber, A.; Wells, C.; Olcina, M. M.; Freeman, K.; Gill, A.; Ritchie, A. J.; Sheppard, D. W.; Russell, A. J.; Hammond, E. M.; Knapp, S.; Brennan, P. E.; Conway, S. J. Optimization of 3,5-Dimethylisoxazole Derivatives as Potent Bromodomain Ligands. *J. Med. Chem.* **2013**, *56* (8), 3217–3227.
- (6) Filippakopoulos, P.; Picaud, S.; Fedorov, O.; Keller, M.; Wrobel, M.; Morgenstern, O.; Bracher, F.; Knapp, S. Benzodiazepines and Benzotriazepines as Protein Interaction Inhibitors Targeting Bromodomains of the BET Family. *Bioorg. Med. Chem.* **2012**, *20* (6), 1878–1886.
- (7) Hewings, D. S.; Wang, M.; Philpott, M.; Fedorov, O.; Uttarkar, S.; Filippakopoulos, P.; Picaud, S.; Vuppusetty, C.; Marsden, B.; Knapp, S.; Conway, S. J.; Heightman, T. D. 3,5-Dimethylisoxazoles Act As Acetyl-Lysine-Mimetic Bromodomain Ligands. *J. Med. Chem.* **2011**, *54* (19), 6761–6770.
- (8) Fish, P. V.; Filippakopoulos, P.; Bish, G.; Brennan, P. E.; Bunnage, M. E.; Cook, A. S.; Fedorov, O.; Gerstenberger, B. S.; Jones, H.; Knapp, S.; Marsden, B.; Nocka, K.; Owen, D. R.; Philpott, M.; Picaud, S.; Primiano, M. J.; Ralph, M. J.; Sciammetta, N.; Trzuppek, J. D. Identification of a Chemical Probe for Bromo and Extra C-Terminal Bromodomain Inhibition through Optimization of a Fragment-Derived Hit. *J. Med. Chem.* **2012**, *55* (22), 9831–9837.
- (9) Vidler, L. R.; Filippakopoulos, P.; Fedorov, O.; Picaud, S.; Martin, S.; Tomsett, M.; Woodward, H.; Brown, N.; Knapp, S.; Hoelder, S. Discovery of Novel Small-Molecule Inhibitors of BRD4 Using Structure-Based Virtual Screening. *J. Med. Chem.* **2013**, *56* (20), 8073–8088.
- (10) Picaud, S.; Leonards, K.; Lambert, J.-P.; Dovey, O.; Wells, C.; Fedorov, O.; Monteiro, O.; Fujisawa, T.; Wang, C.-Y.; Lingard, H.; Blanco, C. T.; Ley, S. V.; Brennan, P.; Muller, S.; Samsonova, A.; Gingras, A.-C.; Schwaller, J.; Vassiliou, G.; Knapp, S.; Filippakopoulos, P. Promiscuous Targeting of Bromodomains by Bromosporine Identifies BET Proteins as Master Regulators of Primary Transcription Response in Leukemia. *Sci. Adv.* **2016**, *2*, e1600760.
